# Supplementary material
Source: Springer Nature journal article supplement (https://www.springermedizin.de/resource/supplementary/13075_2013_4219_MOESM4_ESM.pdf/9696418)

**A**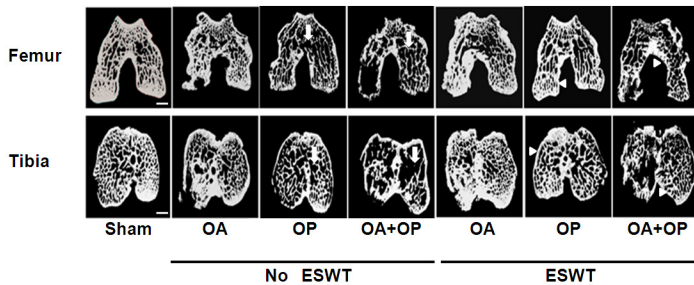**B**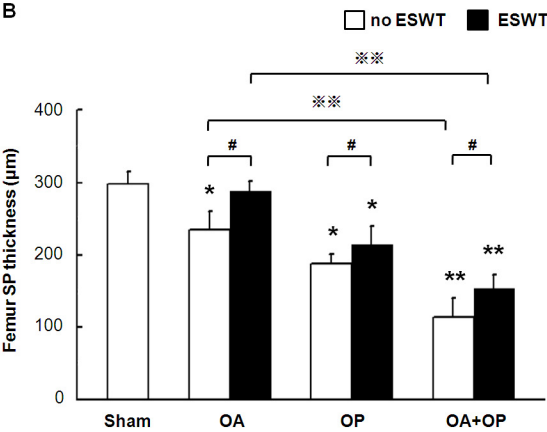**C**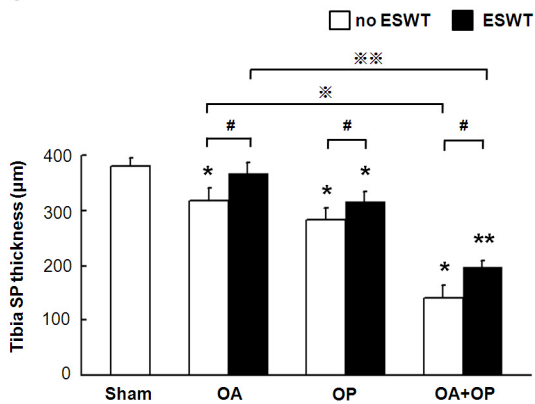**D**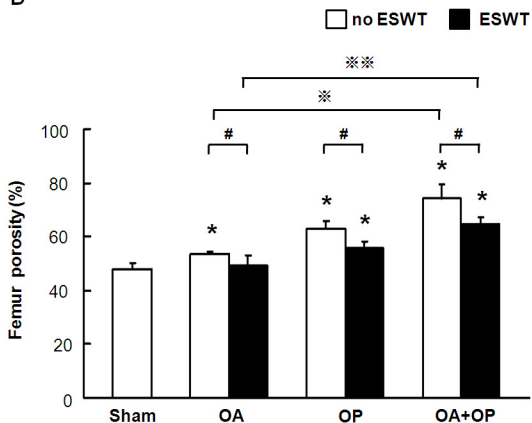**E**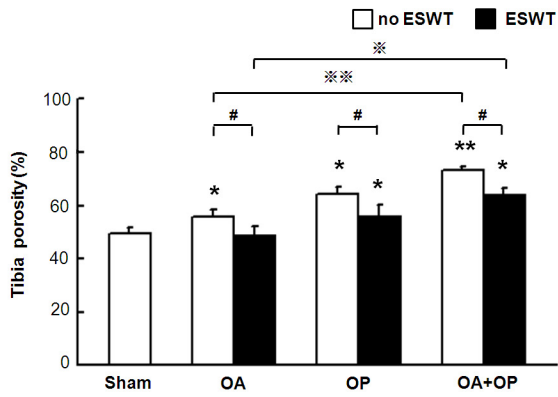

Supplement: MOESM4 [file 9696418]
